# Supplementary material for: Time to diagnosis of idiopathic pulmonary fibrosis in the IPF-PRO Registry
Source: PubMed Central journal article supplement — BMJ Open Respir Res. 2020 Jul 5;7(1):e000567. doi: 10.1136/bmjresp-2020-000567 (PMC7337884; doi:10.1136/bmjresp-2020-000567), 2020-07-05
Supplement: bmjresp-2020-000567supp001.pdf [file bmjresp-2020-000567supp001.pdf]

## Supplemental data

Further details on categorization of time to diagnosis

### Symptom onset

- time to diagnosis  $\leq 1$  year if
  - month-day-year was present and  $\leq 365$  days before diagnosis (n=37)
  - month and year were present and (a) year was the same as diagnosis year (n=51) or (b) year was the year prior to diagnosis year and month was the same or a later month than the diagnosis month (n=76). *Example: a patient diagnosed in June 2017 with symptom onset in June 2016 or after.*
  - year only was present and was the same as diagnosis year (n=10).
- time to diagnosis  $> 1$  year if
  - month-day-year was present and  $> 365$  days before diagnosis (n=9)
  - month and year were present and (a) year was  $\geq 2$  years prior to diagnosis year (n=38) or (b) year was the year prior to diagnosis year and month was an earlier month than diagnosis month (n=19). *Example: a patient diagnosed in June 2017 with symptom onset in May 2016 or earlier.*
  - only year was present and was  $\geq 2$  years prior to diagnosis year (n=107).

### First imaging evidence of fibrosis

- time to diagnosis  $\leq 1$  year if
  - month-day-year was present and  $\leq 365$  days before diagnosis (n=186)
  - month and year were present and (a) year was the same as diagnosis year (n=115) or (b) year was the year prior to diagnosis year and month was the same or a later month than the diagnosis month (n=50). *Example: a patient diagnosed in June 2017 with first imaging evidence in June 2016 or after.*
  - year only was present and was the same as diagnosis year (n=5).
- time to diagnosis  $> 1$  year if
  - month-day-year was present and  $> 365$  days before diagnosis (n=35)
  - month and year were present and (a) year was  $\geq 2$  years prior to diagnosis year (n=25) or (b) year was the year prior to diagnosis year and month was an earlier month than diagnosis month (n=13). *Example: a patient diagnosed in June 2017 with first imaging evidence in May 2016 or earlier.*
  - only year was present and was  $\geq 2$  years prior to diagnosis year (n=25)

A patient was considered not to have a useable date for a given classification if only year was present, and was the year prior to diagnosis. A patient who did not have a useable date for either symptom onset or first imaging evidence of pulmonary fibrosis was excluded from the analysis (n=54).

Supplemental Table 1. Patient characteristics, comorbidities and medications at time of enrollment

|                                                  | Overall analysis cohort | Subset of patients with known date for symptom onset | Subset of patients with known date for first imaging evidence of pulmonary fibrosis | Patients excluded from analysis cohort |
|--------------------------------------------------|-------------------------|------------------------------------------------------|-------------------------------------------------------------------------------------|----------------------------------------|
| <b>N</b>                                         | 498                     | 347                                                  | 454                                                                                 | 56                                     |
| <b>Demographics</b>                              |                         |                                                      |                                                                                     |                                        |
| Age, years                                       | 70 (65, 75)             | 70 (64, 75)                                          | 71 (64, 75)                                                                         | 69 (64, 76)                            |
| Male                                             | 376 (75.5%)             | 264 (76.1%)                                          | 339 (74.7%)                                                                         | 40 (71.4%)                             |
| White                                            | 463 (95.1%)             | 323 (94.7%)                                          | 420 (94.6%)                                                                         | 52 (96.3%)                             |
| <b>Smoking history</b>                           |                         |                                                      |                                                                                     |                                        |
| Non-smoker                                       | 167 (33.7%)             | 118 (34.2%)                                          | 150 (33.2%)                                                                         | 17 (30.4%)                             |
| Smoker                                           | 329 (66.3%)             | 227 (65.8%)                                          | 302 (66.8%)                                                                         | 39 (69.6%)                             |
| Current                                          | 12 (2.4%)               | 9 (2.6%)                                             | 12 (2.7%)                                                                           | 0                                      |
| Past                                             | 317 (63.9%)             | 218 (63.2%)                                          | 290 (64.2%)                                                                         | 39 (69.6%)                             |
| <b>Comorbidities</b>                             |                         |                                                      |                                                                                     |                                        |
| Gastroesophageal reflux disease                  | 265 (53.4%)             | 194 (56.1%)                                          | 239 (52.9%)                                                                         | 31 (55.4%)                             |
| Coronary artery disease                          | 152 (30.7%)             | 97 (28.0%)                                           | 141 (31.3%)                                                                         | 22 (39.3%)                             |
| Obstructive sleep apnea                          | 143 (28.9%)             | 102 (29.7%)                                          | 128 (28.4%)                                                                         | 21 (37.5%)                             |
| Diabetes                                         | 105 (21.1%)             | 77 (22.3%)                                           | 93 (20.5%)                                                                          | 14 (25.0%)                             |
| Hiatal hernia                                    | 81 (16.4%)              | 61 (17.7%)                                           | 73 (16.2%)                                                                          | 10 (18.2%)                             |
| Atrial fibrillation or flutter                   | 47 (9.5%)               | 30 (8.7%)                                            | 42 (9.3%)                                                                           | 10 (17.9%)                             |
| Chronic heart failure                            | 36 (7.3%)               | 19 (5.5%)                                            | 34 (7.6%)                                                                           | 5 (8.9%)                               |
| Pulmonary hypertension                           | 35 (7.1%)               | 23 (6.7%)                                            | 30 (6.7%)                                                                           | 4 (7.1%)                               |
| Prior deep vein thrombosis or pulmonary embolism | 23 (4.7%)               | 15 (4.4%)                                            | 22 (4.9%)                                                                           | 2 (3.6%)                               |
| Prior stroke or intracranial hemorrhage          | 17 (4.2%)               | 10 (3.6%)                                            | 16 (4.4%)                                                                           | 3 (5.7%)                               |

|                                                         | Overall analysis cohort | Subset of patients with known date for symptom onset | Subset of patients with known date for first imaging evidence of pulmonary fibrosis | Patients excluded from analysis cohort |
|---------------------------------------------------------|-------------------------|------------------------------------------------------|-------------------------------------------------------------------------------------|----------------------------------------|
| <b>N</b>                                                | 498                     | 347                                                  | 454                                                                                 | 56                                     |
| Chronic kidney disease                                  | 15 (3.0%)               | 11 (3.2%)                                            | 12 (2.7%)                                                                           | 2 (3.6%)                               |
| Barrett's esophagus                                     | 14 (2.8%)               | 10 (2.9%)                                            | 11 (2.4%)                                                                           | 3 (5.5%)                               |
| Cirrhosis or chronic liver disease                      | 11 (2.2%)               | 8 (2.3%)                                             | 8 (1.8%)                                                                            | 4 (7.1%)                               |
| Lung cancer                                             | 1 (0.2%)                | 0                                                    | 1 (0.2%)                                                                            | 0                                      |
| <b>Family history</b>                                   |                         |                                                      |                                                                                     |                                        |
| Family history of ILD (grandparents, parents, siblings) | 79 (16.5%)              | 54 (16.1%)                                           | 69 (15.8%)                                                                          | 11 (21.6%)                             |
| <b>Supplemental oxygen</b>                              |                         |                                                      |                                                                                     |                                        |
| With activity                                           | 156 (31.8%)             | 121 (35.5%)                                          | 133 (29.7%)                                                                         | 19 (33.9%)                             |
| At rest                                                 | 101 (20.5%)             | 82 (24.0%)                                           | 85 (19.0%)                                                                          | 11 (19.6%)                             |
| <b>Medications</b>                                      |                         |                                                      |                                                                                     |                                        |
| Statin                                                  | 264 (58.9%)             | 173 (54.6%)                                          | 244 (60.1%)                                                                         | 26 (51.0%)                             |
| Proton pump inhibitor                                   | 248 (55.4%)             | 186 (58.7%)                                          | 222 (54.7%)                                                                         | 27 (52.9%)                             |
| ACE-inhibitor or ARB                                    | 130 (29.0%)             | 84 (26.5%)                                           | 119 (29.3%)                                                                         | 16 (31.4%)                             |
| Pirfenidone                                             | 136 (27.3%)             | 103 (29.7%)                                          | 121 (26.7%)                                                                         | 12 (21.4%)                             |
| Anticoagulant                                           | 107 (23.9%)             | 69 (21.8%)                                           | 96 (23.7%)                                                                          | 9 (17.6%)                              |
| Nintedanib                                              | 107 (21.5%)             | 74 (21.3%)                                           | 100 (22.0%)                                                                         | 19 (33.9%)                             |
| Oral steroid                                            | 55 (12.3%)              | 46 (14.5%)                                           | 46 (11.3%)                                                                          | 8 (15.7%)                              |
| H2 blocker                                              | 52 (11.6%)              | 40 (12.6%)                                           | 49 (12.1%)                                                                          | 3 (5.9%)                               |
| Pulmonary vasodilator                                   | 13 (2.9%)               | 9 (2.9%)                                             | 13 (3.2%)                                                                           | 3 (6.0%)                               |
| N-acetylcysteine                                        | 8 (1.8%)                | 7 (2.2%)                                             | 8 (2.0%)                                                                            | 1 (2.0%)                               |
| Immunosuppressive or cytotoxic                          | 8 (1.8%)                | 7 (2.2%)                                             | 7 (1.7%)                                                                            | 0                                      |
| <b>Disease severity</b>                                 |                         |                                                      |                                                                                     |                                        |

|                                        | Overall analysis cohort | Subset of patients with known date for symptom onset | Subset of patients with known date for first imaging evidence of pulmonary fibrosis | Patients excluded from analysis cohort |
|----------------------------------------|-------------------------|------------------------------------------------------|-------------------------------------------------------------------------------------|----------------------------------------|
| <b>N</b>                               | 498                     | 347                                                  | 454                                                                                 | 56                                     |
| FEV <sub>1</sub> % predicted           | 76.9 (64.2, 89.1)       | 75.3 (63.2, 88.6)                                    | 77.8 (64.7, 89.8)                                                                   | 71.6 (64.8, 84.4)                      |
| FVC % predicted                        | 70.6 (58.9, 80.8)       | 68.8 (57.2, 79.8)                                    | 71.1 (59.8, 81.5)                                                                   | 67.5 (60.2, 71.9)                      |
| DLCO % predicted                       | 42.1 (33.0, 51.6)       | 41.2 (32.1, 50.2)                                    | 42.3 (33.0, 51.9)                                                                   | 43.4 (38.1, 49.3)                      |
| Total lung capacity, L                 | 4.1 (3.4, 4.8)          | 3.9 (3.3, 4.7)                                       | 4.1 (3.4, 4.8)                                                                      | 4.4 (3.6, 5.1)                         |
| CPI                                    | 52.7 (44.7, 59.7)       | 53.8 (45.5, 60.5)                                    | 52.5 (44.4, 59.3)                                                                   | 52.1 (46.0, 57.5)                      |
| GAP score                              | 4.0 (3.0, 5.0)          | 4.0 (3.0, 5.0)                                       | 4.0 (3.0, 5.0)                                                                      | 4.0 (3.0, 5.0)                         |
| GAP stage                              |                         |                                                      |                                                                                     |                                        |
| I                                      | 131 (31.2%)             | 88 (29.3%)                                           | 125 (33.0%)                                                                         | 13 (28.3%)                             |
| II                                     | 221 (52.6%)             | 156 (52.0%)                                          | 197 (52.0%)                                                                         | 26 (56.5%)                             |
| III                                    | 68 (16.2%)              | 56 (18.7%)                                           | 57 (15.0%)                                                                          | 7 (15.2%)                              |
| <b>Clinical care</b>                   |                         |                                                      |                                                                                     |                                        |
| Distance to enrolling center, miles    | 29.7 (11.7, 86.9)       | 33.4 (13.8, 105)                                     | 27.6 (11.6, 83.7)                                                                   | 26.9 (13.9, 65.9)                      |
| Any hospitalization in prior 12 months | 158 (32.8%)             | 116 (34.3%)                                          | 133 (30.4%)                                                                         | 18 (33.3%)                             |
| Prior respiratory hospitalization      | 93 (19.3%)              | 69 (20.4%)                                           | 76 (17.4%)                                                                          | 10 (18.5%)                             |
| <b>Insurance</b>                       |                         |                                                      |                                                                                     |                                        |
| Private insurance                      | 321 (66.2%)             | 230 (68.2%)                                          | 291 (66.0%)                                                                         | 31 (56.4%)                             |
| Medicare                               | 322 (66.5%)             | 218 (64.9%)                                          | 295 (66.7%)                                                                         | 35 (64.8%)                             |
| Military health care                   | 20 (4.2%)               | 13 (4.0%)                                            | 17 (4.0%)                                                                           | 2 (3.8%)                               |
| Medicaid                               | 11 (2.3%)               | 10 (3.1%)                                            | 10 (2.3%)                                                                           | 1 (1.9%)                               |
| State-specific plan (not Medicaid)     | 9 (1.9%)                | 7 (2.1%)                                             | 8 (1.9%)                                                                            | 1 (1.9%)                               |
| Other                                  | 21 (4.2%)               | 16 (4.6%)                                            | 19 (4.2%)                                                                           | 3 (5.7%)                               |
| None                                   | 6 (3.0%)                | 4 (2.6%)                                             | 6 (3.3%)                                                                            | 1 (20.0%)                              |

|                         | Overall analysis cohort | Subset of patients with known date for symptom onset | Subset of patients with known date for first imaging evidence of pulmonary fibrosis | Patients excluded from analysis cohort |
|-------------------------|-------------------------|------------------------------------------------------|-------------------------------------------------------------------------------------|----------------------------------------|
| <b>N</b>                | 498                     | 347                                                  | 454                                                                                 | 56                                     |
| <b>Patient location</b> |                         |                                                      |                                                                                     |                                        |
| Rural area <sup>1</sup> | 109 (21.9%)             | 79 (22.8%)                                           | 98 (21.6%)                                                                          | 8 (14.3%)                              |

<sup>1</sup>Rural area = ZIP code is not in a Metropolitan Statistical Area (MSA). Data are median (Q1, Q3) or n (%). ACE, angiotensin converting enzyme; ARB, angiotensin II receptor blockers; CPI, composite physiologic index; GAP, gender, age, lung physiology; GERD, gastroesophageal reflux disease; H2, histamine 2; ILD, interstitial lung disease.

Supplemental table 2a. Patient characteristics at time of symptom onset by time from symptom onset to diagnosis

|                               | All         | Time from symptom onset to diagnosis |             | P     |
|-------------------------------|-------------|--------------------------------------|-------------|-------|
|                               |             | ≤ 1 year                             | > 1 year    |       |
| <b>N</b>                      | 347         | 174                                  | 173         |       |
| <b>Patient characteristic</b> |             |                                      |             |       |
| Age, years                    | 68 (62-72)  | 69 (63-73)                           | 67 (59-72)  | 0.018 |
| Male                          | 264 (76.1%) | 135 (77.6%)                          | 129 (74.6%) | 0.510 |
| Family history of ILD         | 54 (16.1%)  | 28 (16.6%)                           | 26 (15.7%)  | 0.822 |
| Smoking history               |             |                                      |             |       |
| Non-smoker                    | 118 (34.2%) | 58 (33.5%)                           | 60 (34.9%)  | 0.790 |
| Smoker                        | 227 (65.8%) | 115 (66.5%)                          | 112 (65.1%) |       |
| Current                       | 22 (6.4%)   | 9 (5.2%)                             | 13 (7.6%)   | 0.300 |
| Past                          | 169 (49.0%) | 89 (51.4%)                           | 80 (46.5%)  |       |
| Undetermined                  | 36 (10.4%)  | 17 (9.8%)                            | 19 (11.0%)  |       |

Supplemental Table 2b. Comorbidities and disease severity at time of enrollment by time from symptom onset to diagnosis

| Comorbidities                                    | Time from symptom onset to diagnosis |                |
|--------------------------------------------------|--------------------------------------|----------------|
|                                                  | ≤1 year                              | >1 year        |
| Gastroesophageal reflux disease                  | 93 (53.4%)                           | 101 (58.7%)    |
| Obstructive sleep apnea                          | 47 (27.2%)                           | 55 (32.2%)     |
| Coronary artery disease                          | 43 (24.7%)                           | 54 (31.4%)     |
| Diabetes                                         | 40 (23.0%)                           | 37 (21.5%)     |
| Hiatal hernia                                    | 27 (15.5%)                           | 34 (19.9%)     |
| Atrial fibrillation or flutter                   | 12 (6.9%)                            | 18 (10.5%)     |
| Pulmonary hypertension                           | 11 (6.3%)                            | 12 (7.1%)      |
| Chronic heart failure                            | 10 (5.8%)                            | 9 (5.2%)       |
| Prior deep vein thrombosis or pulmonary embolism | 5 (2.9%)                             | 10 (5.9%)      |
| Chronic kidney disease                           | 8 (4.6%)                             | 3 (1.8%)       |
| Prior stroke or intracranial hemorrhage          | 6 (4.3%)                             | 4 (2.9%)       |
| Barrett's esophagus                              | 6 (3.4%)                             | 4 (2.3%)       |
| Cirrhosis or chronic liver disease               | 5 (2.9%)                             | 3 (1.7%)       |
| Lung cancer                                      | 0                                    | 0              |
| <b>Supplemental oxygen</b>                       |                                      |                |
| With activity                                    | 54 (31.8%)                           | 67 (39.2%)     |
| Flow rate, L/min                                 | 3.0 (2.0, 4.0)                       | 3.0 (2.0, 4.0) |
| At rest                                          | 38 (22.4%)                           | 44 (25.6%)     |
| Flow rate, L/min                                 | 2.0 (2.0, 2.5)                       | 2.0 (2.0, 4.0) |
| <b>Medications</b>                               |                                      |                |
| Proton pump inhibitor                            | 93 (58.5%)                           | 93 (58.9%)     |
| Statin                                           | 87 (54.7%)                           | 86 (54.4%)     |
| Bronchodilator                                   | 48 (30.2%)                           | 58 (36.9%)     |
| ACE-inhibitor or ARB                             | 47 (29.6%)                           | 37 (23.4%)     |
| Pirfenidone                                      | 50 (28.7%)                           | 53 (30.6%)     |
| Nintedanib                                       | 42 (24.1%)                           | 32 (18.5%)     |



|                                |                   |                   |
|--------------------------------|-------------------|-------------------|
| Anticoagulant                  | 29 (18.2%)        | 40 (25.5%)        |
| Oral steroid                   | 18 (11.3%)        | 28 (17.7%)        |
| H2 blocker                     | 16 (10.1%)        | 24 (15.2%)        |
| Immunosuppressive or cytotoxic | 4 (2.5%)          | 3 (1.9%)          |
| Pulmonary vasodilator          | 5 (3.2%)          | 4 (2.5%)          |
| N-acetylcysteine               | 1 (0.6%)          | 6 (3.9%)          |
| <b>Disease severity</b>        |                   |                   |
| FEV <sub>1</sub> % predicted   | 73.9 (62.7, 89.0) | 77.3 (63.2, 88.5) |
| FVC % predicted                | 67.4 (57.0, 79.8) | 69.4 (57.2, 79.9) |
| DL <sub>CO</sub> % predicted   | 41.8 (32.6, 50.8) | 40.5 (31.8, 49.8) |
| Total lung capacity, L         | 4.0 (3.4, 4.9)    | 3.8 (3.2, 4.7)    |
| CPI                            | 53.5 (45.3, 60.6) | 54.5 (46.0, 60.5) |
| GAP stage                      | 4.0 (3.0, 5.0)    | 4.0 (3.0, 5.0)    |
| I                              |                   |                   |
| II                             | 43 (29.5%)        | 45 (29.2%)        |
| III                            | 73 (50.0%)        | 83 (53.9%)        |

Data are median (Q1, Q3) or n (%). ACE, angiotensin converting enzyme; ARB, angiotensin II receptor blockers; CPI, composite physiologic index; DL<sub>CO</sub>, diffusing capacity of the lung for carbon monoxide; FEV<sub>1</sub>, forced expiratory volume during 1 second; FVC, forced vital capacity; GAP, gender, age, lung physiology; GERD, gastroesophageal reflux disease; H2, histamine 2; ILD, interstitial lung disease.

Supplemental table 3a. Patient characteristics at time of first imaging evidence by time from first imaging evidence of pulmonary fibrosis to diagnosis

|                               | Time from first imaging evidence to diagnosis |             | P     |
|-------------------------------|-----------------------------------------------|-------------|-------|
|                               | ≤ 1 year                                      | > 1 year    |       |
| <b>N</b>                      | 356                                           | 98          |       |
| <b>Patient characteristic</b> |                                               |             |       |
| Age, years                    | 67 (62, 73)                                   | 69 (63, 72) | 0.288 |
| Male                          | 261 (73.3%)                                   | 78 (79.6%)  | 0.206 |
| Family history of ILD         | 58 (17.0%)                                    | 11 (11.7%)  | 0.216 |
| Smoking history               |                                               |             |       |
| Non-smoker                    | 80 (35.2%)                                    | 21 (28.4%)  | 0.278 |
| Smoker                        | 147 (64.8%)                                   | 53 (71.6%)  |       |
| Current                       | 16 (7.0%)                                     | 5 (6.8%)    | 0.906 |
| Past                          | 111 (48.9%)                                   | 37 (50.0%)  |       |
| Undetermined                  | 20 (8.8%)                                     | 11 (14.9%)  |       |

Data are median (Q1, Q3) or n (%).

Supplemental Table 3b. Comorbidities and disease severity at time of enrollment by time from first imaging evidence of pulmonary fibrosis to diagnosis

|                                                  | First imaging evidence of pulmonary fibrosis to diagnosis |               |
|--------------------------------------------------|-----------------------------------------------------------|---------------|
|                                                  | ≤ 1 year                                                  | > 1 year      |
| <b>N</b>                                         | 356                                                       | 98            |
| <b>Comorbidities</b>                             |                                                           |               |
| Gastroesophageal reflux disease                  | 185 (52.0%)                                               | 54 (56.3%)    |
| Coronary artery disease                          | 109 (30.7%)                                               | 32 (33.3%)    |
| Obstructive sleep apnea                          | 103 (29.1%)                                               | 25 (26.0%)    |
| Diabetes                                         | 64 (18.0%)                                                | 29 (29.9%)    |
| Hiatal hernia                                    | 51 (14.4%)                                                | 22 (22.9%)    |
| Atrial fibrillation or flutter                   | 27 (7.6%)                                                 | 15 (15.8%)    |
| Chronic heart failure                            | 26 (7.4%)                                                 | 8 (8.3%)      |
| Pulmonary hypertension                           | 22 (6.2%)                                                 | 8 (8.3%)      |
| Prior deep vein thrombosis or pulmonary embolism | 15 (4.2%)                                                 | 7 (7.4%)      |
| Prior stroke or intracranial hemorrhage          | 11 (3.8%)                                                 | 5 (6.6%)      |
| Chronic kidney disease                           | 8 (2.3%)                                                  | 4 (4.2%)      |
| Barrett's esophagus                              | 6 (1.7%)                                                  | 5 (5.2%)      |
| Cirrhosis or chronic liver disease               | 7 (2.0%)                                                  | 1 (1.0%)      |
| Lung cancer                                      | 0                                                         | 1 (1.0%)      |
| <b>Supplemental oxygen</b>                       |                                                           |               |
| With activity                                    | 104 (29.5%)                                               | 29 (30.2%)    |
| Flow rate, L/min                                 | 3.0 (2.0-4.0)                                             | 3.0 (2.0-4.0) |
| At rest                                          | 65 (18.4%)                                                | 20 (21.1%)    |
| Flow rate, L/min                                 | 2.0 (2.0-3.0)                                             | 3.0 (2.0-4.0) |
| <b>Medications</b>                               |                                                           |               |
| Statin                                           | 186 (59.0%)                                               | 58 (63.7%)    |
| Proton pump inhibitor                            | 167 (53.0%)                                               | 55 (60.4%)    |
| Bronchodilator                                   | 102 (32.5%)                                               | 35 (38.9%)    |

|                                | First imaging evidence of pulmonary fibrosis to diagnosis |                   |
|--------------------------------|-----------------------------------------------------------|-------------------|
|                                | ≤ 1 year                                                  | > 1 year          |
| <b>N</b>                       | 356                                                       | 98                |
| ACE-inhibitor or ARB           | 91 (28.9%)                                                | 28 (30.8%)        |
| Pirfenidone                    | 90 (25.3%)                                                | 31 (31.6%)        |
| Nintedanib                     | 84 (23.6%)                                                | 16 (16.3%)        |
| Anticoagulant                  | 64 (20.3%)                                                | 32 (35.6%)        |
| H2 blocker                     | 37 (11.7%)                                                | 12 (13.2%)        |
| Oral steroid                   | 34 (10.8%)                                                | 12 (13.2%)        |
| Immunosuppressive or cytotoxic | 2 (0.6%)                                                  | 5 (5.6%)          |
| Pulmonary vasodilator          | 7 (2.2%)                                                  | 6 (6.6%)          |
| N-acetylcysteine               | 6 (1.9%)                                                  | 2 (2.2%)          |
| <b>Disease severity</b>        |                                                           |                   |
| FEV <sub>1</sub> , % predicted | 76.8 (63.8, 89.1)                                         | 81.7 (68.2, 92.3) |
| FVC, % predicted               | 70.7 (59.3, 80.8)                                         | 72.4 (60.1, 84.1) |
| DL <sub>CO</sub> , % predicted | 43.7 (33.5, 52.7)                                         | 40.5 (32.1, 47.5) |
| Total lung capacity, L         | 4.0 (3.4, 4.8)                                            | 4.3 (3.4, 4.9)    |
| CPI                            | 52.3 (43.6, 59.3)                                         | 54.3 (46.2, 59.5) |
| GAP score                      | 4.0 (3.0, 5.0)                                            | 4.0 (3.0, 5.0)    |
| GAP stage                      |                                                           |                   |
| I                              | 105 (34.7%)                                               | 20 (26.3%)        |
| II                             | 154 (50.8%)                                               | 43 (56.6%)        |
| III                            | 44 (14.5%)                                                | 13 (17.1%)        |

Data are median (Q1, Q3) or n (%). ACE, angiotensin converting enzyme; ARB, angiotensin II receptor blockers; CPI, composite physiologic index; DL<sub>CO</sub>, diffusing capacity of the lung for carbon monoxide; FEV<sub>1</sub>, forced expiratory volume during 1 second; FVC, forced vital capacity; GAP, gender, age, lung physiology; GERD, gastroesophageal reflux disease; H2, histamine 2; ILD, interstitial lung disease.
